# Supplementary figures and images for: LPS and palmitic acid Co-upregulate microglia activation and neuroinflammatory response
Source: PubMed Central journal article supplement — Compr Psychoneuroendocrinol. 2021 Mar 17;6:100048. doi: 10.1016/j.cpnec.2021.100048 (PMC9216426; doi:10.1016/j.cpnec.2021.100048), 2021-03-17

Fig. S1

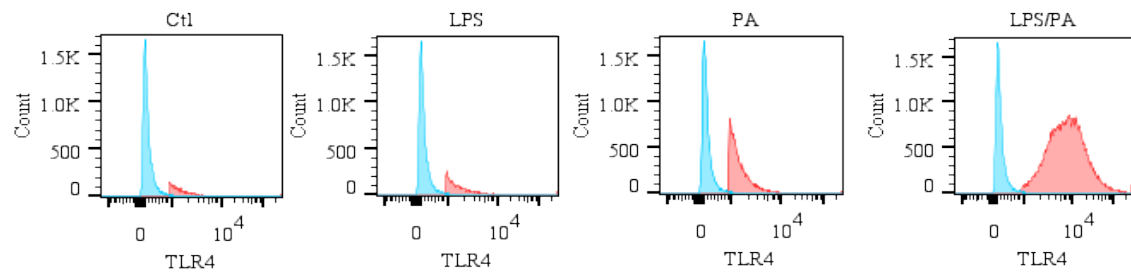

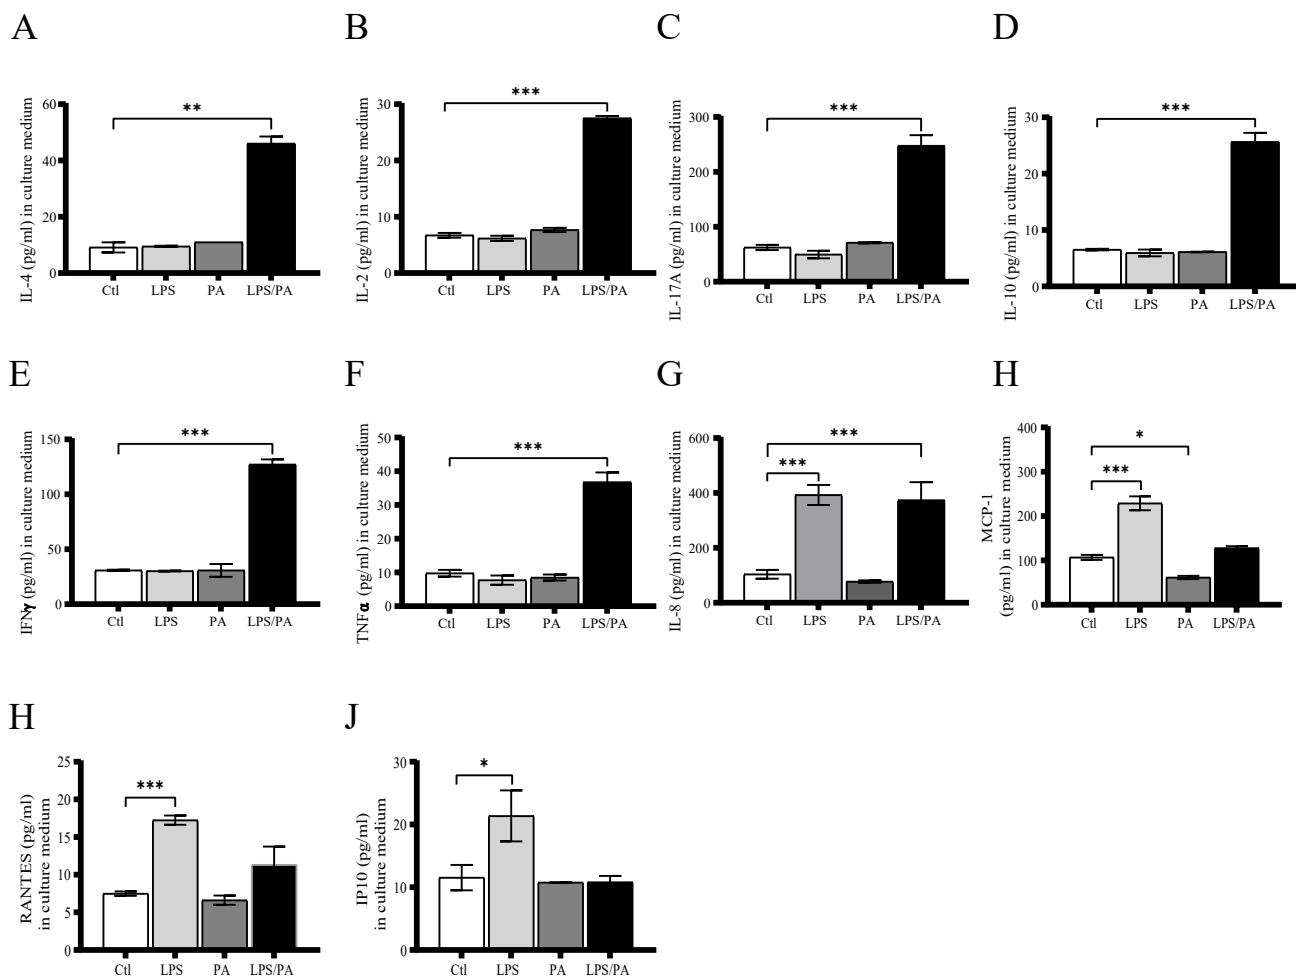

Fig. S3

A

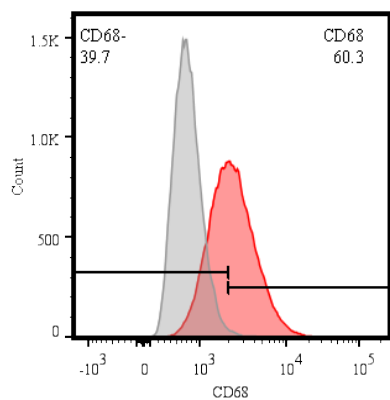

B

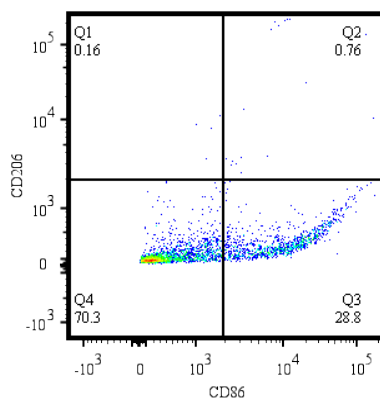

C

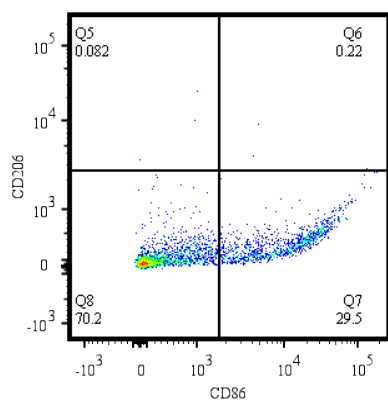

D

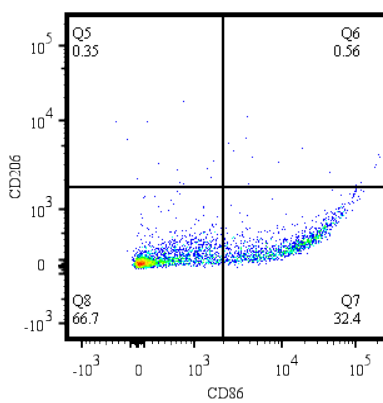

E

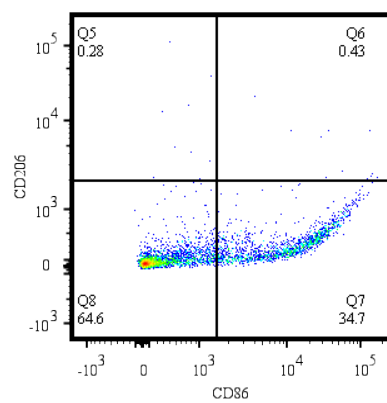

A

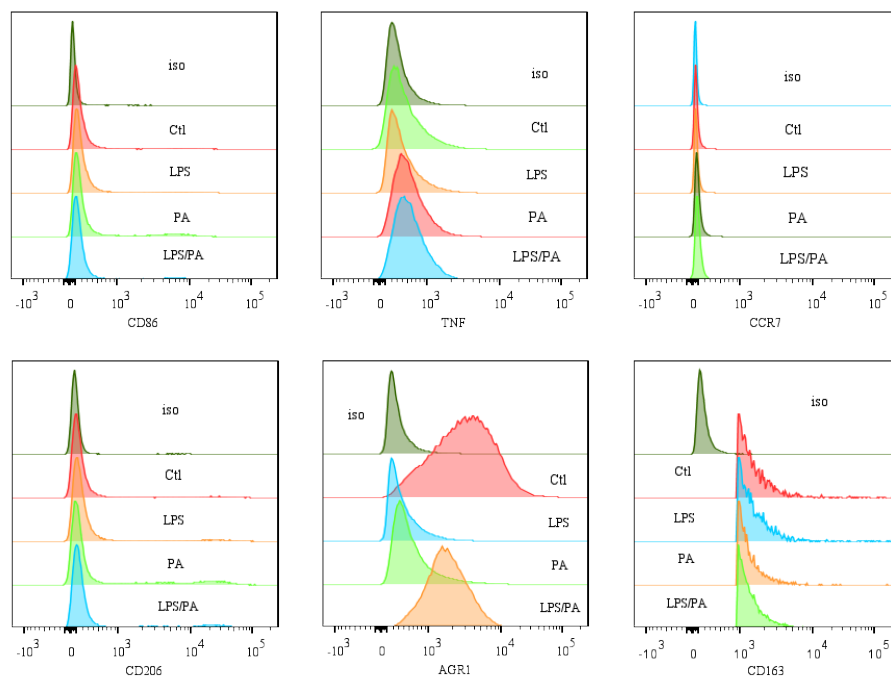

B

|              | M1 marker (%) |      |      | M2 marker (%) |      |       |
|--------------|---------------|------|------|---------------|------|-------|
|              | CD86          | TNF  | CCR7 | CD206         | Arg1 | CD163 |
| Control      | 7.02          | 12.4 | 0.23 | 8.85          | 88.4 | 3.89  |
| LPS 100ng/ml | 8.13          | 9.65 | 0.18 | 10.3          | 9.39 | 4.05  |
| PA 200μM     | 14.4          | 13.7 | 0.3  | 22.4          | 18.3 | 5.59  |
| LPS/PA       | 14.2          | 15.6 | 0.27 | 21.8          | 86.6 | 16.1  |

Supplement: mmc1.pdf [file mmc1.pdf]
